# Supplementary material for: Nanobody Mediated Crystallization of an Archeal Mechanosensitive Channel
Source: PubMed Central journal article supplement (PMC3804602; doi:10.1371/journal.pone.0077984), 2013-10-21
Supplement: pone.0077984.s001.pdf [file pone.0077984.s001.pdf]

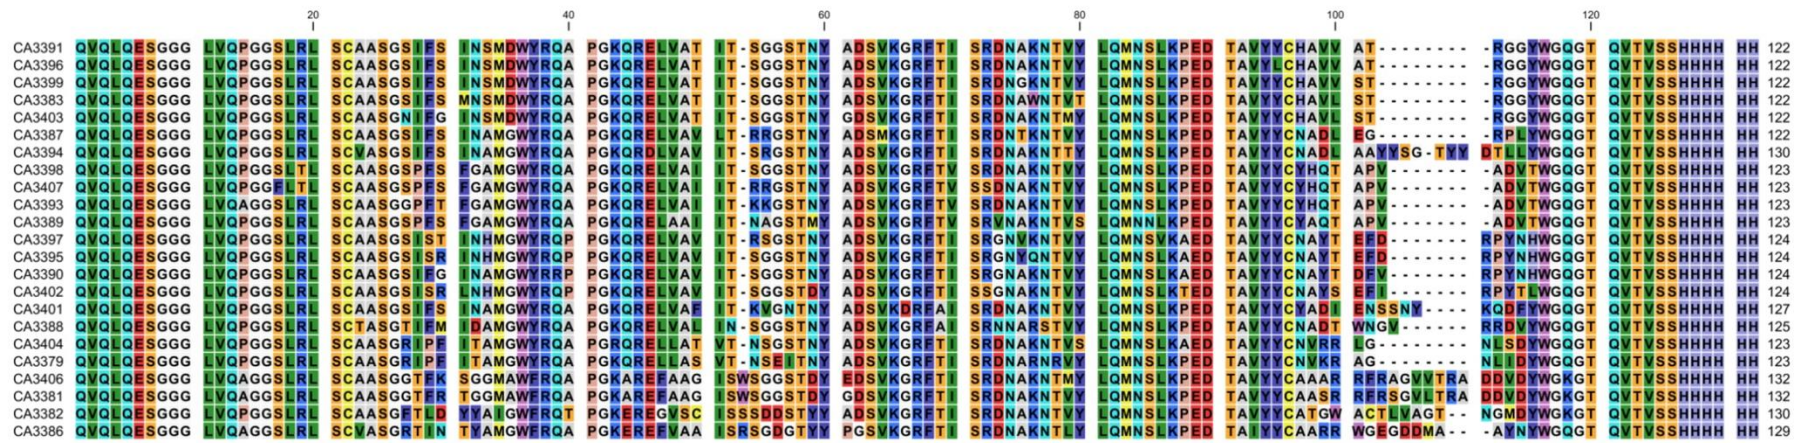

Supplementary Fig. S1. Sequence alignment of all 23 selected T2 specific binders. Corresponding CA-numbering for each nanobody can be found in Table 1.
